# Supplementary material for: Mixed sex cord–stromal tumor (gynandroblastoma) with malignant morphology involving both ovaries: a case report
Source: PubMed Central journal article supplement — J Int Med Res. 2023 Jul 26;51(7):03000605231187796. doi: 10.1177/03000605231187796 (PMC10387786; doi:10.1177/03000605231187796), 2023-07-26
Supplement: sj-pdf-1-imr-10.1177_03000605231187796.pdf [file sj-pdf-1-imr-10.1177_03000605231187796.pdf]

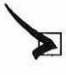

| Topic                                | Item | Checklist item description                                                                             | Reported on Line                                                    |
|--------------------------------------|------|--------------------------------------------------------------------------------------------------------|---------------------------------------------------------------------|
| Title                                | 1    | The diagnosis or intervention of primary focus followed by the words "case report"                     | Page 1 line 8                                                       |
|                                      | 2    | 2 to 5 key words that identify diagnoses or interventions in this case report, including "case report" | Page 1 line 52                                                      |
|                                      | 3a   | Introduction: What is unique about this case and what does it add to the scientific literature?        | Page 2 line 12-21                                                   |
|                                      | 3b   | Main symptoms and/or important clinical findings                                                       | Page 2 line 21-37                                                   |
| Introduction                         | 3c   | The main diagnoses, therapeutic interventions, and outcomes                                            | Page 2 line 21-37                                                   |
|                                      | 3d   | Conclusion—What is the main "take-away" lesson(s) from this case?                                      | Page 2 line 42-49                                                   |
|                                      | 4    | One or two paragraphs summarizing why this case is unique (may include references)                     | Page 4 line 6-47                                                    |
|                                      | 5a   | De-identified patient specific information                                                             | ✓                                                                   |
| Patient Information                  | 5b   | Primary concerns and symptoms of the patient                                                           | Page 5 line 12                                                      |
|                                      | 5c   | Medical, family, and psycho-social history including relevant genetic information                      | Page 5 line 14-19                                                   |
|                                      | 5d   | Relevant past interventions with outcomes                                                              | Page 5 line 14                                                      |
|                                      | 6    | Describe significant physical examination (PE) and important clinical findings                         | Page 5 line 21                                                      |
| Clinical Findings                    | 7    | Historical and current information from this episode of care organized as a timeline                   | ✓                                                                   |
|                                      | 8a   | Diagnostic testing (such as PE, laboratory testing, imaging, surveys)                                  | Page 5/56                                                           |
|                                      | 8b   | Diagnostic challenges (such as access to testing, financial, or cultural)                              | Page 6 line 38                                                      |
|                                      | 8c   | Diagnosis (including other diagnoses considered)                                                       | Page 6 line 25                                                      |
| Therapeutic Intervention             | 8d   | Prognosis (such as staging in oncology) where applicable                                               | ✓                                                                   |
|                                      | 9a   | Types of therapeutic intervention (such as pharmacologic, surgical, preventive, self-care)             | Page 6 line 31-33                                                   |
|                                      | 9b   | Administration of therapeutic intervention (such as dosage, strength, duration)                        | Page 6 line 31-33                                                   |
|                                      | 9c   | Changes in therapeutic intervention (with rationale)                                                   | None                                                                |
| Follow-up and Outcomes               | 10a  | Clinician and patient-assessed outcomes (if available)                                                 | None                                                                |
|                                      | 10b  | Important follow-up diagnostic and other test results                                                  | Page 6 - line 39                                                    |
|                                      | 10c  | Intervention adherence and tolerability (How was this assessed?)                                       | None                                                                |
|                                      | 10d  | Adverse and unanticipated events                                                                       | None                                                                |
| Discussion                           | 11a  | A scientific discussion of the strengths AND limitations associated with this case report              | Page 7,8 99                                                         |
|                                      | 11b  | Discussion of the relevant medical literature with references                                          | Page 9 line 21-52                                                   |
|                                      | 11c  | The scientific rationale for any conclusions (including assessment of possible causes)                 | Page 10 line 12                                                     |
|                                      | 11d  | The primary "take-away" lessons of this case report (without references) in a one paragraph conclusion | Page 10 line 18                                                     |
| Patient Perspective Informed Consent | 12   | The patient should share their perspective in one to two paragraphs on the treatment(s) they received  | ✓                                                                   |
|                                      | 13   | Did the patient give informed consent? Please provide if requested                                     | Yes <input checked="" type="checkbox"/> No <input type="checkbox"/> |

*B. Baraka*
